# Supplementary material
Source: PubMed Central journal article supplement (PMC1801027)
Supplement: bmj_334_7589_346__1.pdf [file bmj_334_7589_346__1.pdf]

### **Web references**

- w1. Cylus J, Anderson GF. *Multinational comparisons of health systems data, 2006*. New York: Commonwealth Fund, 2006.
- w2. Commonwealth Fund Commission on a High Performance Health System. *Why not the best? Results from a national scorecard on US health system performance*. New York: Commonwealth Fund, 2006.
- w3. Schoen C, Osborn R, Huynh PT, Doty MM, Zapert K, Peugh J, Davis K. Taking the pulse of health care systems: experiences of patients with health problems in six countries. *Health Aff (Millwood)* 2005 Nov 28.  
<http://content.healthaffairs.org/cgi/content/abstract/hlthaff.w5.509>.
